1 **Elevated 11-oxygenated androgens are not a major contributor to HPG-axis disturbances**  
2 **in adults with congenital adrenal hyperplasia due to 21-hydroxylase deficiency**

3 Matthias K. Auer<sup>1</sup>, Luisa Paizoni<sup>1</sup>, Meike Neuner<sup>1</sup>, Christian Lottspeich<sup>1</sup>, Heinrich Schmidt<sup>2</sup>, Martin  
4 Bidlingmaier<sup>1</sup>, James Hawley<sup>3</sup>, Brian Keevil<sup>3</sup>, Nicole Reisch<sup>1</sup>

5 <sup>1</sup>Medizinische Klinik and Poliklinik IV, Klinikum der Universität München, LMU München, Munich,  
6 Germany

7 <sup>2</sup>Department of Pediatric Endocrinology, Dr. von Haunersches Children's Hospital, Klinikum der  
8 Universität München, LMU München, Munich, Germany

9 <sup>3</sup>Department of Clinical Biochemistry, Manchester University Foundation NHS Trust, Manchester  
10 Academic Health Sciences Centre, Southmoor Rd, Manchester, UK

11

12 **Corresponding author:**

13 Nicole Reisch

14 Medizinische Klinik and Poliklinik IV, Klinikum der Universität München

15 Ziemssenstr. 1

16 80336 München

17 Germany

18 Email: Nicole.reisch@med.uni-muenchen.de

19

20 **Declaration of interest**

21

22 All authors have declared that no conflict of interest exists

23

24

25

26

27

28

## 29 **Highlights**

30

31 • The 11-oxygenated androgens 11-ketotestosterone and 11 $\beta$ -hydroxyandrostenedione are  
32 significantly elevated in men with CAH with hypogonadotropic hypogonadism and women with  
33 amenorrhea.

34 • Elevated 17-OHP levels in male patients and elevated testosterone levels in female patients are  
35 however the dominant predictor of HPG-axis disturbances.

36 • 11-oxygenated androgens are not predictive for testicular adrenal rest tumors in men with CAH

37 • 11-ketotestosterone and 11 $\beta$ -hydroxyandrostenedione levels do not seem to be influenced by  
38 intake of oral contraceptives.

39

40

41

42

43

44

45

46

47

48

49

50

51

52

53

## 54 **Abstract**

### 55 **Context**

56 Hypothalamus-pituitary-gonadal (HPG)-axis disturbances are a common phenomenon in patients with  
57 classic congenital adrenal hyperplasia (CAH). 11-oxygenated androgens have been suggested to play  
58 a role in this context.

### 59 **Design**

60 Cross-sectional single center study including 89 patients (N=42 men, N=55 women) with classic CAH.

### 61 **Main Outcome Measures**

62 Independent predictors for hypogonadism in men and secondary amenorrhea in women with CAH with  
63 a special focus on 11-ketotestosterone (11KT) and 11 $\beta$ -hydroxyandrostenedione (11OHA4).

### 64 **Results**

65 Hypogonadotropic hypogonadism was present in 23% of men and 61% of those women currently not  
66 on contraceptives suffered from irregular menstrual cycles or amenorrhea. Testicular adrenal rest  
67 tumor (TART) was documented in 28% of men. While 11KT (3.5x) and 11OHA4 (5.7x) among other  
68 adrenal steroids were significantly elevated in men with hypogonadism, in stepwise logistic regression,  
69 the only significant independent predictor for hypogonadism were elevated 17-OHP levels (B = 0.006;  
70 p = 0.039). Although 11KT (5.2x) and 11OHA4 (3.7x) levels were also significantly higher in women  
71 with amenorrhea in comparison to those with a regular cycle, the only significant predictor for  
72 amenorrhea were elevated total testosterone levels (B = 1.806; p = 0.040). 11-oxygenated androgens  
73 were not different in those with TART and those without. Of note, there were no significant differences  
74 in 11OHA4 or 11KT between those with a regular cycle and those currently on hormonal  
75 contraceptives.

### 76 **Conclusions**

77 11-oxygenated androgens do not seem to add additional information for explaining menstrual  
78 disturbances and hypogonadism in patients with CAH in comparison to established marker of disease  
79 control.

80

81 **Keywords**

82 Congenital adrenal hyperplasia, hypogonadism, menstrual cycle, 11-ketotestosterone, 11-oxygenated  
83 androgens

84

85 **Abbreviations**

|     |               |                                       |
|-----|---------------|---------------------------------------|
| 86  | <b>11KT</b>   | 11-ketotestosterone                   |
| 87  | <b>11OHA4</b> | 11 $\beta$ -hydroxyandrostenedione    |
| 88  | <b>17-OHP</b> | 17 $\alpha$ -hydroxyprogesterone      |
| 89  | <b>ACTH</b>   | Adrenocorticotrophic hormone          |
| 90  | <b>AR</b>     | Androgen receptor                     |
| 91  | <b>CAH</b>    | Congenital adrenal hyperplasia        |
| 92  | <b>CPA</b>    | Cyproterone acetate                   |
| 93  | <b>DHEAS</b>  | Dehydroepiandrosterone sulfate        |
| 94  | <b>ER</b>     | Estrogen receptor                     |
| 95  | <b>FC</b>     | Fludrocortisone                       |
| 96  | <b>FSH</b>    | Follicle-stimulating hormone          |
| 97  | <b>GC</b>     | Glucocorticoid(s)                     |
| 98  | <b>GnRH</b>   | Gonadotropin releasing hormone        |
| 99  | <b>HC</b>     | Hydrocortisone                        |
| 100 | <b>HPG</b>    | Hypothalamus-pituitary-gonadal        |
| 101 | <b>LH</b>     | Luteinizing hormone                   |
| 102 | <b>PR</b>     | Progesterone receptor                 |
| 103 | <b>SERM</b>   | Selective estrogen receptor modulator |
| 104 | <b>SHBG</b>   | Sex hormone binding globulin          |
| 105 | <b>SV</b>     | Simply virilizing                     |
| 106 | <b>SW</b>     | Salt-wasting                          |
| 107 | <b>TART</b>   | Testicular adrenal rest tumor         |

108

109 **Acknowledgments**

110 We thank all participants for taking part in this study

111  
112 **Funding**

113  
114 This work was supported by the IFCAH grant 2013 to NR and by the Deutsche  
115 Forschungsgemeinschaft (Heisenberg Professorship 325768017 to NR and Projektnummer:  
116 314061271-TRR205 to NR). The authors declare no competing interests.

117

118

119

120

121

122

123

124

125

126

127

128

129

130

131

132

133

## 134 **1. Introduction**

135 Congenital adrenal hyperplasia (CAH) encompasses a group of hereditary autosomal recessive  
136 disorders that are characterized by mutations in key enzymes of cortisol synthesis. Among these,  
137 patients affected by mutations in the 21-alpha hydroxylase gene are the largest entity (1). Depending  
138 on the severity of the underlying mutation, patients are either suffering from isolated glucocorticoid-  
139 (simply virilizing form= SV) or additional mineralocorticoid-deficiency, when less than 1-2% of  
140 enzymatic activity is retained (salt-wasting = SW). Glucocorticoid deficiency in turn results in ACTH  
141 overstimulation due to the loss of hypothalamo-pituitary negative feedback which subsequently drives  
142 excessive adrenal androgen production (2).

143 Hypothalamus-pituitary-gonadal (HPG)-axis disturbances are a common phenomenon in CAH patients  
144 of both sexes. In particular in women in the fertile age, menstrual disturbances occur in up to 30% (3-  
145 5). The most obvious mechanism for this finding is the inherent extra-gonadal androgen and  
146 progesterone production in CAH. Correspondingly, menstrual cycle disturbances in female patients  
147 with CAH have been associated with poor treatment control as indicated by increased 17-OHP,  
148 testosterone, progesterone and androstenedione levels (6). In line, a recent study from the DSD-life  
149 cohort demonstrated that an androstenedione/testosterone ratio  $\geq 1$ , indicating excessive adrenal  
150 testosterone production, is a strong predictor of sub-normal testosterone levels in men with CAH (7).  
151 Most of these patients correspondingly present with low or inadequately low gonadotropin levels  
152 indicating hypogonadotropic hypogonadism, while some patients also show signs of primary testicular  
153 damage mainly due to testicular adrenal rest tumor (TART) formation (7-9)

154 However, HPG-axis disturbances can also be found in patients who are regarded well controlled  
155 based on the aforementioned treatment markers (4,10). The exact culprit for HPG disturbances is  
156 therefore not always clear, as all major steroids, namely testosterone, estradiol and progesterone are  
157 important parts of the HPG feedback loop (11).

158 In recent years, a further class of adrenal-derived androgens has come into focus in the context of  
159 CAH. These are 11-oxygenated 19-carbon androgens, in particular 11-ketotestosterone (11KT) and  
160 11 $\beta$ -hydroxyandrostenedione (11OHA4). Androstenedione can be converted to 11OHA4 by 11 $\beta$ -  
161 hydroxylase, then to 11-ketoandrostenedione through the action of 11 $\beta$ -hydroxysteroid  
162 dehydrogenase type 2 and finally to 11KT (12,13). It has been demonstrated that 11KT and its

163 derivate 11KT-dihydrotestosterone act at the androgen receptor with equal potency to the classic  
164 testosterone and dihydrotestosterone (DHT) (14). Correspondingly, it has been shown that these  
165 steroids are significantly elevated in patients with classic CAH (15). While it has been suggested that  
166 elevated 11KT levels might contribute to HPG-suppression at the hypothalamic and pituitary level,  
167 their clinical relevance has still to be determined (16). Although testosterone exerts direct negative  
168 effects at the hypothalamic levels via AR binding (17,18), estradiol seems to be the dominant  
169 suppressor in this context (19). As 11KT cannot be directly aromatized questions a dominant role in  
170 HPG suppression in this context (14).

171 In the present study, we were therefore interested if 11-oxygenated androgens, in particular 11-KT  
172 would add information on HPG-axis disturbances in adult patients with CAH due to 21-hydroxylase  
173 deficiency in addition to established markers of disease control.

174 In detail, we hypothesized that 11KT would be higher in men with hypogonadotropic hypogonadism  
175 than in those with eugonadism, that 11OHA4 would be higher in males with TART than in those  
176 without and that 11KT and 11OHA4 would be higher in women with menstrual irregularities in contrast  
177 to those with eumenorrhoea. In an exploratory analysis we were further interested if 11KT and  
178 11OHA4 would differ between women with a regular cycle and those on oral contraceptive therapy to  
179 estimate if these potential covariates should be accounted for in the clinical context if our main  
180 hypotheses would hold true.

## 181 **2. Material and Methods**

### 182 **Subjects**

183 We included 89 patients (N=42 men, N=55 women) of whom 58 were suffering from SW and 31 of the  
184 SV form of CAH. All patients were seen at the outpatient clinic of the Medizinische Klinik IV, Klinikum  
185 der Universität München, LMU Munich. All patients were directly approached during a regular visit in  
186 the outpatient clinic. The recruitment period was from January 2012 to January 2014. The local ethics  
187 committee of the Ludwig-Maximilians-Universität München approved the study protocol. All  
188 participants provided their written informed consent.

189

### 190 **Testicular ultrasound**

191 Testicular ultrasound was performed in the Department of Endocrinology in the University Hospital  
192 Munich by a trained sonographer (Siemens Acuson S2000). Testicular ultrasound was performed  
193 documenting testicular masses. Greyscale and color Doppler ultrasonography were obtained in the  
194 longitudinal and transverse planes using a 15MHz transducer. Data on TART was missing in seven  
195 men.

196

### 197 **Hormone assays and hormonal control**

198 Blood was drawn in fasting patients in the morning between 8 and 10 a.m., roughly 2 hours after the  
199 intake of the morning medication of participants. Concentrations of adrenocorticotrophic hormone  
200 (ACTH), sex hormone binding globulin (SHBG) and DHEAS were determined using the Liaison  
201 chemiluminescence immunoassays (DiaSorin, Sallugia, Italy).

202 Total testosterone, 17-OHP, androstenedione, 11-KT and 11OHA4 were quantified by LC-MS/MS.  
203 Steroid extraction and quantitation was carried out as previously described (20).

204 Daily doses of glucocorticoids and mineralocorticoids were evaluated. Equal hydrocortisone doses  
205 were calculated according to their suggested androgen-suppressive capacity (hydrocortisone=1,  
206 prednisolone=4, dexamethasone=70) and adjusted to the patients' body surface area (2). In men,  
207 hypogonadism was defined as having a low testosterone level <12nmol/l (21)(39). Hypogonadotropic  
208 hypogonadism was defined as having low testosterone levels with inappropriately normal or low  
209 LH/FSH. Secondary amenorrhea was defined as not having had a spontaneous menstrual bleeding  
210 during the last six months prior to study inclusion, while irregular cycles were defined as having as  
211 cycle length that was less than 21 or more than 35 days (22).

212

### 213 **Statistical analysis**

214 Statistical analysis was performed using PASW Statistics (formerly SPSS) Version 22.0 for Windows.  
215 Sample characteristics were compared using  $\chi^2$  tests for categorical variables and the Mann-Whitney  
216 U test for continuous variables.

217 Spearman correlation was performed for univariate correlations. Partial regression analyses with LH  
218 and FSH as a dependent variable and potential influential factors as independent variables were  
219 performed adjusted for age and BMI. Separate multivariate regression analyses were used to identify  
220 independent contributors for hypogonadism in men and secondary amenorrhea in women. Due to the  
221 strong correlation among most steroid measures, variables were mean centered before addition to the



222 model. A two-block linear regression analysis was carried out to assess the contribution of different  
223 variables. Block 1 included age and BMI using a forced entry method. In Block 2, we added CAH-  
224 specific covariates using forward stepwise regression analysis. A two-sided P value of <0.05 was  
225 considered statistically significant.

226

## 227 **3. Results**

228

### 229 **General characteristics**

230 The median age of the cohort was 28 years (range 18-61). The median GC equivalence dosage was  
231 16.0 mg/m<sup>2</sup>/d for men and 14.6 mg/m<sup>2</sup>/d for women. According to the expected (residual) enzymatic  
232 activity, thirteen (21.0% of whom data was available) patients were assigned to genotype group 0, 21  
233 (33.9%) to genotype group A, 24 (38.7%) to genotype group B and four (6.5%) patients to genotype  
234 group C (23).

235 Of those investigated, TART was present in eleven patients (28.2%). 23% presented with  
236 hypogonadotropic hypogonadism. There were no men with primary hypogonadism.

237 Thirty seven percent of women were currently receiving hormonal contraceptive therapy. From those  
238 without oral contraception and in premenopausal age, 38.7% had a regular cycle while 25.8% had  
239 irregular menses and 35.5% were amenorrhoeic. Three women were postmenopausal (6%). At study  
240 inclusion, of those with a regular cycle, 75% were in the follicular and 25% in the luteal phase of the  
241 cycle (Table 1).

242 **Table 1 General characteristics**

|                   |         | Men    |    | Women  |    |       |
|-------------------|---------|--------|----|--------|----|-------|
|                   |         | N (39) | %  | N (50) | %  | p     |
| Mutation          |         |        |    |        |    |       |
| Mutation group    | 0       | 8      | 21 | 5      | 10 | 0.293 |
|                   | A       | 12     | 31 | 9      | 18 |       |
|                   | B       | 8      | 21 | 16     | 32 |       |
|                   | C       | 2      | 5  | 2      | 4  |       |
|                   | Unknown | 9      | 23 | 18     | 36 |       |
| Simply virilizing |         | 12     | 31 | 19     | 38 |       |
| Salt wasting      |         | 27     | 69 | 32     | 64 | 0.477 |

|                                            |                         |      |               |      |               |       |       |
|--------------------------------------------|-------------------------|------|---------------|------|---------------|-------|-------|
| TART                                       | Yes                     | 11   | 28.2          | NA   | NA            |       |       |
|                                            | unilateral              | 3    |               | NA   | NA            |       |       |
|                                            | bilateral               | 7    |               | NA   | NA            |       |       |
|                                            | No                      | 21   | 53.8          | NA   | NA            |       |       |
|                                            | Missing                 | 7    | 17.9          | NA   | NA            |       |       |
| Hypogonadism                               |                         |      | 0             |      |               |       | NA    |
|                                            | Eugonadism              | 30   | 77            | NA   | NA            |       |       |
|                                            | Sec. hypogonadismus     | 9    | 23            | NA   | NA            |       |       |
|                                            | Primary hypogonadism    | 0    | 0             | NA   | NA            |       |       |
|                                            |                         |      |               |      |               |       |       |
| Cycle                                      | Oral contraception      | NA   | NA            | 16   | 32            |       | NA    |
|                                            | Regular cycle           | NA   | NA            | 12   | 24            | 38.7* |       |
|                                            | Follicular              | NA   | NA            | 9    | 12            | 75%** |       |
|                                            | Luteal                  | NA   | NA            | 3    | 8             | 25%** |       |
|                                            | Irregular menses        | NA   | NA            | 8    | 16            | 25.8* |       |
|                                            | Secondary amenorrhea    | NA   | NA            | 11   | 22            | 35.5* |       |
|                                            | Postmenopausal          | NA   | NA            | 3    | 6             |       |       |
|                                            |                         |      | 0             |      | 0             |       |       |
| GC                                         | None                    | 0    | 0             | 2    | 4             |       | 0.359 |
|                                            | HC                      | 18   | 46            | 19   | 38            |       |       |
|                                            | Predniso-ne/-lone       | 16   | 41            | 24   | 48            |       |       |
|                                            | Dexa                    | 4    | 10            | 3    | 6             |       |       |
|                                            | HC + Dexa               | 0    | 0             | 3    | 6             |       |       |
|                                            | Predniso-ne/-lone +Dexa | 1    | 3             | 0    | 0             |       |       |
|                                            |                         |      |               |      |               |       |       |
|                                            |                         |      | <b>Median</b> |      | <b>Median</b> |       |       |
| HC Equivalence-dosage (mg/m <sup>2</sup> ) |                         | 14.6 |               | 16.0 |               |       | 0.143 |

243 *Man-Whitney U, X2 test*

244 *\*Of those not on contraception*

245 *\*\*of those with regular cycle*

246 *NA not applicable*

247 *TART: testicular adrenal rest tumor*

248 *HC: hydrocortisone*

249 *GC: glucocorticoid*

250 *Dexa: Dexamethasone*

251 *TART: Testicular adrenal rest tumor*

252

253 There were no significant differences in androstenedione,17-OHP,11KT and 11OHA4 levels between

254 men and women. (Table 2).

255

256

257 **Table 2 Anthropometric measures and hormone values**

|                          | Men    |             |       | Women  |             |       | p     |
|--------------------------|--------|-------------|-------|--------|-------------|-------|-------|
|                          | Median | Percentiles |       | Median | Percentiles |       |       |
|                          |        | 25          | 75    |        | 25          | 75    |       |
| Age                      | 28.0   | 24.0        | 40.0  | 29.0   | 24.0        | 38.0  | 0.990 |
| BMI (kg/m <sup>2</sup> ) | 26.0   | 22.7        | 29.9  | 26.8   | 22.3        | 30.8  | ND    |
| Waist (cm)               | 95.0   | 81.3        | 100.8 | 78.0   | 70.0        | 92.0  | ND    |
| Body fat (%)             | 25.6   | 13.1        | 25.7  | 34.3   | 18.5        | 33.2  | ND    |
| Lean mass (%)            | 57.1   | 52.5        | 63.1  | 44.4   | 40.1        | 48.8  | ND    |
| LH (U/l)                 | 3.0    | 1.8         | 4.7   | 3.4    | 0.9         | 5.7   | ND    |
| FSH (U/l)                | 5.0    | 2.8         | 7.2   | 4.6    | 2.8         | 6.9   | ND    |
| ACTH (pg/ml)             | 11.0   | 6.0         | 55.0  | 10.0   | 4.0         | 29.0  | 0.219 |
| Testosterone (nmol/l)    | 13.0   | 10.9        | 16.7  | 0.5    | 0.2         | 1.5   | ND    |
| Androstenedione (nmol/l) | 3.6    | 1.1         | 8.2   | 2.0    | 0.9         | 6.0   | 0.155 |
| 17-OHP (nmol/l)          | 23.3   | 5.2         | 153.6 | 14.0   | 2.8         | 64.5  | 0.125 |
| 11KT (nmol/l)            | 1.2    | 0.3         | 2.4   | 0.6    | 0.2         | 2.4   | 0.335 |
| 11OHA4 (nmol/l)          | 2.0    | 0.3         | 8.0   | 1.3    | 0.3         | 5.5   | 0.550 |
| DHEAS (µg/ml)            | 0.3    | 0.2         | 0.5   | 0.0    | 0.0         | 0.2   | ND    |
| SHBG (nmol/l)            | 33.5   | 24.1        | 39.1  | 57.8   | 39.2        | 145.1 | ND    |
| A/T-ratio                | 0.30   | 0.1         | 0.7   | 3.7    | 3.5         | 4.8   | ND    |
| 11KT/T-ratio             | 0.1    | 0.02        | 0.24  | 1.2    | 1.0         | 1.7   | ND    |
| FAI (%)                  | 12.4   | 9.0         | 17.2  | 0.2    | 0.1         | 0.8   | ND    |
| HOMA-IR                  | 1.6    | 1.1         | 2.0   | 2.2    | 1.0         | 3.4   | 0.190 |

258 *Mann-Whitney U*

259 *ND not determined*

260 *FAI: free androgen index*

261 *11OHA4: 11-β hydroxyandrostenedione*

262 *11KT: 11-ketotestosterone*

263 *T: Testosterone*

264

265

266 **Correlations between steroid measures**

267 In men, there was a strong positive correlation between 11KT with ACTH (0.845;  $p < 0.001$ ),  
 268 androstenedione ( $R = 0.933$ ;  $p < 0.001$ ), 17-OHP ( $R = 0.942$ ;  $p < 0.001$ ) and the  
 269 androstenedione/testosterone (A/T)-ratio ( $R = 0.837$ ;  $p < 0.001$ ). A negative correlation of 11KT with  
 270 testosterone was only seen on a trend level ( $R = -0.278$ ;  $p = 0.087$ ) and there was no significant

271 correlation with the free androgen index (FAI). 11OHA4 correlated positively with ACTH ( $R = 0.868$ ;  $p$   
272  $< 0.001$ ), androstenedione ( $0.944$ ;  $p < 0.001$ ), 17-OHP ( $R = 0.947$ ;  $p < 0.001$ ) and the A/T-ratio ( $R =$   
273  $0.857$ ;  $p < 0.001$ ). 11KT and 11OHA4 also were strongly correlated ( $R = 0.976$ ;  $p < 0.001$ ).

274 In women, there was a positive correlation of 11KT with ACTH ( $R = 0.552$ ;  $p < 0.001$ ), total  
275 testosterone ( $R = 0.899$ ;  $p < 0.001$ ), androstenedione ( $R = 0.889$ ;  $p < 0.001$ ), 17-OHP ( $R = 0.915$ ;  $p <$   
276  $0.001$ ), DHEAS ( $R = 0.618$ ;  $p < 0.001$ ) and the FAI ( $R = 0.780$ ;  $p < 0.001$ ). 11OHA4 correlated  
277 positively with ACTH ( $R = 0.604$ ;  $p < 0.001$ ), total testosterone ( $R = 0.875$ ;  $p < 0.001$ ),  
278 androstenedione ( $R = 0.886$ ;  $p < 0.001$ ), 17-OHP ( $R = 0.915$ ;  $p < 0.001$ ), DHEAS ( $R = 0.637$ ;  $p <$   
279  $0.001$ ) and the FAI ( $R = 0.781$ ;  $p < 0.001$ ). The correlation between 11KT and 11OHA4 was weaker  
280 than in men ( $R = 0.477$ ;  $p < 0.001$ ).

### 281 **Presence of TART**

282 There were no significant differences in steroid measures between those with and without TART.  
283 There was also no difference in ACTH or gonadotropin levels, HC equivalence dosage or SV vs. SW  
284 (data not shown).

### 285 **Hypogonadism in men**

286 Androstenedione levels were significantly higher in men with secondary hypogonadism than in those  
287 with eugonadism ( $4.5x$ ;  $p = 0.023$ ). A similar pattern could be observed with 17-OHP ( $14.4x$ ;  $p =$   
288  $0.007$ ), 11KT ( $3.5x$ ;  $p = 0.020$ ), 11OHA4 ( $5.7x$ ,  $p = 0.009$ ) and ACTH ( $9.3x$ ;  $p = 0.004$ ) (Figure 1).

289

290

291

292

293

294

295

296

297

298

299 **Figure 1 Differences between men with hypogonadism and eugonadism**

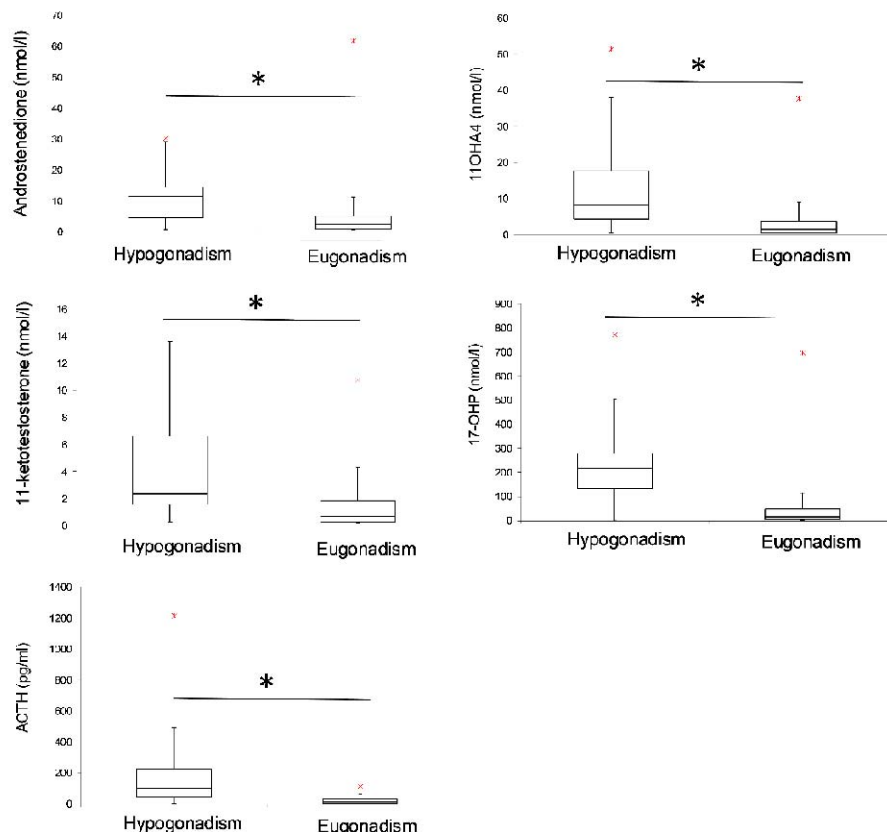

300

301 **Fig 1** Androstenedione levels were significantly higher in men with secondary hypogonadism than in  
302 those with eugonadism (4.5x;  $p = 0.023$ ). Same was true for 17-OHP (14.4x;  $p = 0.007$ ), 11KT (3.5x;  $p$   
303  $= 0.020$ ), 11OHA4 (5.7x,  $p = 0.009$ ) and ACTH (9.3x;  $p = 0.004$ ). (Boxes represent the first to the third  
304 quartile, vertical line indicates medians, crosses indicate outliers).

305

### 306 LH/FSH in men

307 In men, according to partial correlation analysis, adjusted for BMI and age, there was no significant  
308 correlation of LH with any steroid measure. There was also no correlation with HC equivalence  
309 dosage, type of GC (HC = 0 vs. synthetic GC = 1) or with regard to SV vs. SW.

310 In contrast, there were comparably strong negative correlations of androstenedione ( $R = -0.330$ ;  $p =$   
311  $0.048$ ), 17-OHP ( $R = -0.329$ ;  $p = 0.047$ ); 11KT ( $R = -0.368$ ;  $p = 0.025$ ), 11OHA4 ( $R = -0.361$ ;  $p =$   
312  $0.028$ ), the A/T-ratio ( $R = -0.387$ ;  $p = 0.018$ ) as well as the KT/T-ratio ( $R = -0.383$ ;  $p = 0.019$ ) with FSH.

313 There was no significant correlation with LH or FSH when adding KT+T as a new variable, given then  
314 idea that both androgens should have equimolar androgenic potency according to the literature.

### 315 **Predictors of hypogonadism in men**

316 The only significant predictor for hypogonadism in men were elevated 17-OHP levels (B = 0.006; p =  
317 0.039) in a stepwise logistic regression (0 = Eugonadism, 1= hypogonadism), including age, BMI,  
318 ACTH, androstenedione, 17-OHP, DHEAS, 11KT and 11OHA4. As expected, finding also remained  
319 significant when adding HC-equivalence dosage as well as HC (0) vs GC (1) to the model (Table 3).

320 **Table 3 Stepwise regression of potential predictors of hypogonadism in men**

| Variable | B     | S.E. | p           | Exp(B) | 95% C.I. |       |
|----------|-------|------|-------------|--------|----------|-------|
|          |       |      |             |        | Lower    | Upper |
| Age*     | -.037 | .048 | .435        | .963   | 0.877    | 1.058 |
| BMI*     | -.004 | .105 | .966        | .996   | 0.811    | 1.222 |
| 17-OHP   | .006  | .003 | <b>.039</b> | 1.006  | 1.000    | 1.011 |

321 *\*Forced entry including ACTH, androstenedione, 17-OHP, DHEAS, 11KT and 11OHA4 as independent*  
322 *variables.*

323 *All variables were mean-centered. C.I. confidence interval*

324

### 325 **Amenorrhea in women**

326 ACTH (4.3x; p = 0.003), androstenedione (2.5x; p = 0.019), 17-OHP (8.1x; p = 0.002), 11KT (5.2x; p =  
327 0.002), 11OHA4 (3.7x; p = 0.023) and testosterone (3.1x; p = 0.007) were significantly higher in  
328 women with amenorrhea versus regular cycling women (Figure 2).

329

330

331

332

333

334

335

336

337

338

339  
340  
341  
342

**Figure 2 Differences between regular cycling and amenorrhoeic women**

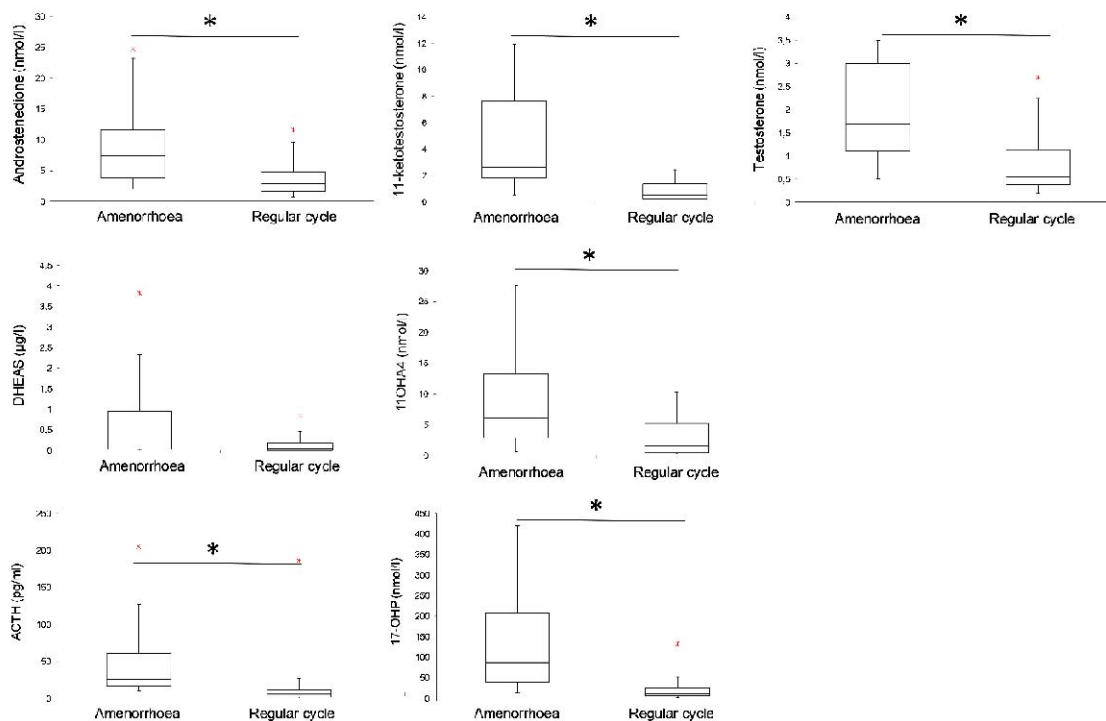

343  
344  
345  
346  
347  
348  
349

**Fig 2** ACTH (4.3x;  $p = 0.003$ ), androstenedione (2.5x;  $p = 0.019$ ), 17-OHP (8.1x;  $p = 0.002$ ), 11KT (5.2x;  $p = 0.002$ ), 11OHA4 (3.7x;  $p = 0.023$ ) and testosterone (3.1x;  $p = 0.007$ ) were significantly higher in women with amenorrhoea in comparison to those with a regular cycle. (Boxes represent the first to the third quartile, vertical line indicates medians, crosses indicate outliers).

350 Equivalence dosage of HC was lower (12.7mg/m<sup>2</sup> vs 16.4mg/m<sup>2</sup>;  $p = 0.019$ ). There was no difference  
351 in terms of GC vs HC use or HOMA-IR. There was also no difference in DHEAS levels and the A/T-  
352 ratio. There was no significant difference in these parameters between those with irregular and those  
353 with a regular cycle (data not shown).

#### 354 Oral contraceptive use

355 Androstenedione ( $p = 0.011$ ), the FAI ( $p = 0.001$ ) and DHEAS ( $p = 0.049$ ) were significantly lower in  
356 women with a regular menstrual cycle in comparison to women currently taking an oral contraceptive  
357 pill, while there was no difference in total testosterone, 17-OHP, 11KT or 11OHA4 (Figure 3).

358

359

360 **Figure 3 Oral contraception vs regular cycle**

361

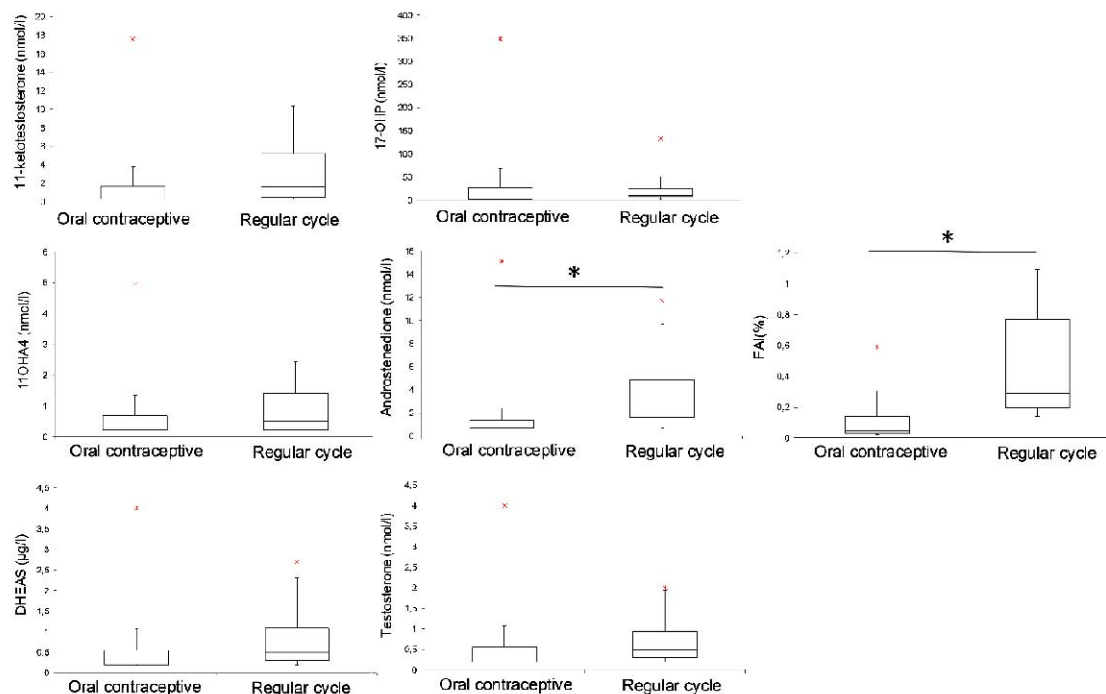

362

363 **Fig 3** When comparing those with a regular menstrual cycle with those currently taking an oral  
364 contraceptive pill, androstenedione ( $p = 0.011$ ), the FAI ( $p = 0.001$ ) and DHEAS ( $p = 0.049$ ) were  
365 significantly lower, while there was no difference in total testosterone, 17-OHP, 11KT or 11OHA4. ).  
366 (Boxes represent the first to the third quartile, vertical line indicates medians, crosses indicate  
367 outliers).

368

### 369 Predictors of amenorrhea

370 Only higher testosterone levels were significantly associated with amenorrhea ( $B = 1.806$ ;  $p = 0.040$ )  
371 in a logistic regression analysis including age, BMI (Enter) (0 = amenorrhea, 1= regular cycle), ACTH,  
372 androstenedione, 17-OHP, DHEAS, total testosterone, free testosterone, the A/T-ratio, 11KT,  
373 11OHA4, and the T/KT-ratio (stepwise) (Table 4).

374

375



376

377

378 **Table 4 Stepwise regression of potential predictors of amenorrhea**

| Variable     | B      | S.E.  | p            | Exp(B) | 95% C.I. |        |
|--------------|--------|-------|--------------|--------|----------|--------|
|              |        |       |              |        | Lower    | Upper  |
| Age*         | -0.097 | 0.111 | 0.381        | .908   | 0.731    | 1.127  |
| BMI*         | -0.024 | 0.095 | 0.804        | .977   | 0.812    | 1.176  |
| Testosterone | 1.806  | 0.877 | <b>0.040</b> | 6.085  | 1.091    | 33.955 |
| Constant     | 0.796  | 0.803 | 0.321        | 2.216  |          |        |

379 *\*Forced entry; Stepwise including ACTH, androstenedione, 17-OHP, DHEAS, total testosterone, free*  
380 *testosterone, the A/T-ratio, 11KT, 11OHA4, and the T/KT-ratio as independent variables. All variables*  
381 *were mean-centered. C.I. confidence interval.*

382

## 383 4. Discussion

384 We could demonstrate in this relatively large cohort that 11-oxygenated androgens are significantly  
385 elevated in patients of both sexes with HPG-axis disturbances. They however do not seem to be the  
386 most relevant androgens in this context.

387 The prevalence of hypogonadism in men and menstrual irregularities in women in our cohort was  
388 comparable to that reported in the literature (7,24) and hence emphasizes that HPG-axis disturbances  
389 are still a fairly common issue in this patient population. Despite a significant elevation of 11KT and  
390 11OHA4, being in accordance with earlier studies (16), 17-OHP was a better predictor of  
391 hypogonadism in male patients. Our data therefore do not indicate a leading role of 11KT in HPG-axis  
392 suppression. This may be due to the fact that 11KT cannot be converted into estrogenic steroids and  
393 many effects that had originally been attributed to testosterone in men are actually mediated via  
394 aromatization to estradiol (25). This also includes sex steroid regulation at the hypothalamus/pituitary  
395 level (19).

396 The significant role of 17OHP may be explained by the fact that progesterone is also a very potent  
397 suppressor of the HPG-axis in men (26,27). As 17-OHP is a direct metabolite of progesterone, it is a

398 potent agonist of the PR (28) as also indicated by a strong positive correlation between both steroids  
399 in patients with CAH (29).

400 In contrast to previous work (16) and our initial hypothesis, neither 11KT nor 11OHA4 were elevated in  
401 men with TART and most steroid measures, including 11KT and 11OHA4 showed a negative instead  
402 of a positive correlation with FSH as a potential marker of gonadal damage. Although our cohort was  
403 age-wise comparable to those adult patients reported by Turcu et al., a considerable proportion of their  
404 patients with TART were children. While TARTs in younger patients might still respond to HPA-axis  
405 suppression, they seem to become less modifiable in the long-term due to fibrotic modifications (30).  
406 In line, presence of TART has been associated with poor treatment quality in some (8) but not all  
407 studies (9,31). Despite the factor of age, we cannot exclude that there were further differences in non-  
408 recorded potential confounders such as long-term disease control distinguishing our patient groups.

409 11KT and 11OHA4 levels were also higher in women with secondary amenorrhea than in those with a  
410 regular cycle, as having been reported before (16). But again, when adding other markers of disease  
411 control to our model, testosterone was superior in explaining amenorrhea. Correspondingly, menstrual  
412 cycle disturbances in female patients with CAH have been associated with poor androgen control (6).  
413 Testosterone modulates GnRH-pulse frequency and therefore interferes with the complex hormonal  
414 interplay during the menstrual cycle (32). In addition, it also has direct effects on the endometrium  
415 (33).

416 Of note, there were no significant differences in 11KT or 11OHA4 between those with a regular cycle  
417 and those currently taking hormonal contraceptives. This may be due to a lower binding affinity for  
418 SHBG that has been suggested but not yet demonstrated for these steroids. This could be of clinical  
419 relevance, as this might explain why some patients benefit less from oral contraceptive treatment with  
420 regard to hyperandrogenic symptoms such as hirsutism and acne (34). However, prospective studies  
421 are needed to substantiate this finding.

422 There are several limitations of our study. Firstly, due to the cross-sectional design we can only show  
423 associations and no causality between dependent and independent variables. Prospective studies  
424 with modifying interventions are therefore needed. A further limitation in this context is that, in contrast  
425 to the general recommendation, the definition on hypogonadism in our study was based on a single,  
426 instead of two testosterone measures in the morning (21). However, diurnal variance of testosterone

427 and LH in CAH do generally differ from the general male population due to the extra-gonadal  
428 androgen production and also depend on GC pharmacokinetics (1). A further limitation of our study is  
429 that we only used a single steroid measurement in the morning for our analyses. Steroid  
430 measurements from blood drawn before the intake of the morning GC dosage might therefore yield  
431 other results. However, all patients included were either receiving a morning dosage of HC or  
432 prednisolone or an evening dosage of dexamethasone which show, given the wide inter-individual  
433 variability, a comparable suppression profile for the chosen time window (35,36).

434 Lastly, although we investigated a large group of adult patients with classic CAH, given the rarity of  
435 the disease, subgroups were rather small, stepwise regression had to be used for our final models.  
436 Nonetheless, given the strong differences in steroid markers between groups we consider our results  
437 to be valid.

## 438 **5. Conclusion**

439 In the present study, 11KT and 11OHA4 did not seem to add additional information to the  
440 understanding of HPG-axis disturbances in CAH. Further studies have to show if 11oxC19 steroids are  
441 of relevance for explaining for other health issues in CAH. It might be of particular interest, if they  
442 could be a superior biomarker of disease control. To our knowledge it has not yet been shown to what  
443 extent 11-oxygenated androgens show a diurnal variation, potentially addressing the still problematic  
444 issue of timing of blood sampling with regard to different GC treatment regimens. Former approaches  
445 to overcome these restrictions like serial salivary (36) or blood sampling (37), or hair steroid measures  
446 (52) are on the one hand very time consuming and on the other hand have so far not yet been proven  
447 to be superior in terms of predicting clinically relevant long-term outcomes. Lastly, it would have to be  
448 demonstrated that 11KT can be independently targeted by treatment-modification, independent of  
449 other adrenal androgens.

450

451

452

453

454

455

456

457

## 458 6. References

459

- 460 1. Speiser PW, Arlt W, Auchus RJ, Baskin LS, Conway GS, Merke DP, Meyer-Bahlburg HFL,  
461 Miller WL, Murad MH, Oberfield SE, White PC. Congenital Adrenal Hyperplasia Due to Steroid  
462 21-Hydroxylase Deficiency: An Endocrine Society Clinical Practice Guideline. *J Clin*  
463 *Endocrinol Metab.* 2018;103(11):4043-4088.
- 464 2. White PC, Speiser PW. Congenital adrenal hyperplasia due to 21-hydroxylase deficiency.  
465 *Endocrine reviews.* 2000;21(3):245-291.
- 466 3. Turcu AF, Mallappa A, Elman MS, Avila NA, Marko J, Rao H, Tsodikov A, Auchus RJ, Merke  
467 DP. 11-Oxygenated Androgens Are Biomarkers of Adrenal Volume and Testicular Adrenal  
468 Rest Tumors in 21-Hydroxylase Deficiency. *The Journal of clinical endocrinology and*  
469 *metabolism.* 2017;102(8):2701-2710.
- 470 4. Stikkelbroeck NM, Sweep CF, Braat DD, Hermus AR, Otten BJ. Monitoring of menstrual  
471 cycles, ovulation, and adrenal suppression by saliva sampling in female patients with 21-  
472 hydroxylase deficiency. *Fertility and sterility.* 2003;80(4):1030-1036.
- 473 5. RICHARDS GE, GRUMBACH MM, KAPLAN SL, CONTE FA. The Effect of Long Acting  
474 Glucocorticoids on Menstrual Abnormalities in Patients with Virilizing Congenital Adrenal  
475 Hyperplasia\*. *The Journal of Clinical Endocrinology & Metabolism.* 1978;47(6):1208-1215.
- 476 6. Bachelot A, Chakhtoura Z, Plu-Bureau G, Coudert M, Coussieu C, Badachi Y, Dulon J,  
477 Charbit B, Touraine P, Group CS. Influence of hormonal control on LH pulsatility and secretion  
478 in women with classical congenital adrenal hyperplasia. *European journal of endocrinology.*  
479 2012;167(4):499.
- 480 7. Engels M, Gehrman K, Falhammar H, Webb EA, Nordenstrom A, Sweep F, Span PN, van  
481 Herwaarden AE, Rohayem J, Richter-Unruh A. Gonadal function in adult male patients with  
482 congenital adrenal hyperplasia. *European journal of endocrinology.* 2018;EJE-17-0862.
- 483 8. King TF, Lee MC, Williamson EE, Conway GS. Experience in optimizing fertility outcomes in  
484 men with congenital adrenal hyperplasia due to 21 hydroxylase deficiency. *Clinical*  
485 *endocrinology.* 2016;84(6):830-836.
- 486 9. Reisch N, Flade L, Scherr M, Rottenkolber M, Pedrosa Gil F, Bidlingmaier M, Wolff H,  
487 Schwarz H-P, Quinkler M, Beuschlein F. High prevalence of reduced fecundity in men with  
488 congenital adrenal hyperplasia. *The Journal of Clinical Endocrinology & Metabolism.*  
489 2009;94(5):1665-1670.
- 490 10. Richards G, Grumbach M, Kaplan S, Conte F. The effect of long acting glucocorticoids on  
491 menstrual abnormalities in patients with virilizing congenital adrenal hyperplasia. *The Journal*  
492 *of Clinical Endocrinology & Metabolism.* 1978;47(6):1208-1215.
- 493 11. Kaprara A, Huhtaniemi IT. The hypothalamus-pituitary-gonad axis: tales of mice and men.  
494 *Metabolism.* 2018;86(3-17).
- 495 12. Turcu AF, Rege J, Auchus RJ, Rainey WE. 11-Oxygenated androgens in health and disease.  
496 *Nature Reviews Endocrinology.* 2020;1-13.
- 497 13. Turcu AF, Auchus RJ. Clinical significance of 11-oxygenated androgens. *Current opinion in*  
498 *endocrinology, diabetes, and obesity.* 2017;24(3):252.
- 499 14. Imamichi Y, Yuhki K-i, Orisaka M, Kitano T, Mukai K, Ushikubi F, Taniguchi T, Umezawa A,  
500 Miyamoto K, Yazawa T. 11-ketotestosterone is a major androgen produced in human gonads.  
501 *The Journal of Clinical Endocrinology & Metabolism.* 2016;101(10):3582-3591.
- 502 15. Turcu AF, Nanba AT, Chomic R, Upadhyay SK, Giordano TJ, Shields JJ, Merke DP, Rainey  
503 WE, Auchus RJ. Adrenal-derived 11-oxygenated 19-carbon steroids are the dominant

- 504 androgens in classic 21-hydroxylase deficiency. *European journal of endocrinology*.  
505 2016;174(5):601-609.
- 506 16. Turcu AF, Mallappa A, Elman MS, Avila NA, Marko J, Rao H, Tsodikov A, Auchus RJ, Merke  
507 DP. 11-Oxygenated androgens are biomarkers of adrenal volume and testicular adrenal rest  
508 tumors in 21-hydroxylase deficiency. *The Journal of Clinical Endocrinology & Metabolism*.  
509 2017;102(8):2701-2710.
- 510 17. Resko JA, Ellinwood WE. Negative feedback regulation of gonadotropin secretion by  
511 androgens in fetal rhesus macaques. *Biology of reproduction*. 1985;33(2):346-352.
- 512 18. KEENAN BS, EBERLE AJ, SPARROW JT, GREGER NG, PANKO WB. Dihydrotestosterone  
513 heptanoate: synthesis, pharmacokinetics, and effects on hypothalamic-pituitary-testicular  
514 function. *The Journal of Clinical Endocrinology & Metabolism*. 1987;64(3):557-562.
- 515 19. Raven G, de Jong FH, Kaufman J-M, de Ronde W. In men, peripheral estradiol levels directly  
516 reflect the action of estrogens at the hypothalamo-pituitary level to inhibit gonadotropin  
517 secretion. *The Journal of Clinical Endocrinology & Metabolism*. 2006;91(9):3324-3328.
- 518 20. Hawley JM, Adaway JE, Owen LJ, Keevil BG. Development of a total serum testosterone,  
519 androstenedione, 17-hydroxyprogesterone, 11 $\beta$ -hydroxyandrostenedione and 11-  
520 ketotestosterone LC-MS/MS assay and its application to evaluate pre-analytical sample  
521 stability. *Clinical Chemistry and Laboratory Medicine (CCLM)*. 2020;58(5):741-752.
- 522 21. Arver S, Lehtihet M. Current guidelines for the diagnosis of testosterone deficiency. *Advances*  
523 *in the management of testosterone deficiency*. Vol 37: Karger Publishers; 2009:5-20.
- 524 22. Master-Hunter T, Heiman DL. Amenorrhea: evaluation and treatment. *American family*  
525 *physician*. 2006;73(8):1374-1382.
- 526 23. Krone N, Braun A, Roscher AA, Knorr D, Schwarz HP. Predicting phenotype in steroid 21-  
527 hydroxylase deficiency? Comprehensive genotyping in 155 unrelated, well defined patients  
528 from southern Germany. *The Journal of Clinical Endocrinology & Metabolism*.  
529 2000;85(3):1059-1065.
- 530 24. Reichman DE, White PC, New MI, Rosenwaks Z. Fertility in patients with congenital adrenal  
531 hyperplasia. *Fertility and sterility*. 2014;101(2):301-309.
- 532 25. Finkelstein JS, Lee H, Burnett-Bowie S-AM, Pallais JC, Yu EW, Borges LF, Jones BF, Barry  
533 CV, Wulczyn KE, Thomas BJ. Gonadal steroids and body composition, strength, and sexual  
534 function in men. *New England Journal of Medicine*. 2013;369(11):1011-1022.
- 535 26. Auer MK, Fuss J, Stalla GK, Athanasoulia AP. Twenty years of endocrinologic treatment in  
536 transsexualism: analyzing the role of chromosomal analysis and hormonal profiling in the  
537 diagnostic work-up. *Fertility and sterility*. 2013;100(4):1103-1110.
- 538 27. Fuss J, Claro L, Ising M, Biedermann SV, Wiedemann K, Stalla GK, Briken P, Auer MK. Does  
539 sex hormone treatment reverse the sex-dependent stress regulation? A longitudinal study on  
540 hypothalamus-pituitary-adrenal (HPA) axis activity in transgender individuals.  
541 *Psychoneuroendocrinology*. 2019;104(228-237).
- 542 28. Attardi BJ, Zeleznik A, Simhan H, Chiao JP, Mattison DR, Caritis SN, Network OFPRU.  
543 Comparison of progesterone and glucocorticoid receptor binding and stimulation of gene  
544 expression by progesterone, 17-alpha hydroxyprogesterone caproate, and related progestins.  
545 *American journal of obstetrics and gynecology*. 2007;197(6):599. e591-599. e597.
- 546 29. HUGHES IA, WINTER JS. The relationships between serum concentrations of 17OH-  
547 progesterone and other serum and urinary steroids in patients with congenital adrenal  
548 hyperplasia. *The Journal of Clinical Endocrinology & Metabolism*. 1978;46(1):98-104.
- 549 30. Claahsen-Van der Grinten H, Otten B, Stikkelbroeck M, Sweep F, Hermus A. Testicular  
550 adrenal rest tumours in congenital adrenal hyperplasia. *Best practice & research Clinical*  
551 *endocrinology & metabolism*. 2009;23(2):209-220.
- 552 31. Reisch N, Scherr M, Flade L, Bidlingmaier M, Schwarz H-P, Muller-Lisse U, Reincke M,  
553 Quinkler M, Beuschlein F. Total adrenal volume but not testicular adrenal rest tumor volume is  
554 associated with hormonal control in patients with 21-hydroxylase deficiency. *The Journal of*  
555 *Clinical Endocrinology & Metabolism*. 2010;95(5):2065-2072.
- 556 32. Melrose P, Gross L. Steroid effects on the secretory modalities of gonadotropin-releasing  
557 hormone release. *Endocrinology*. 1987;121(1):190-199.
- 558 33. Rose GL, Dowsett M, Mudge JE, White JO, Jeffcoate SL. The inhibitory effects of danazol,  
559 danazol metabolites, gestrinone, and testosterone on the growth of human endometrial cells in  
560 vitro. *Fertility and sterility*. 1988;49(2):224-228.
- 561 34. Martin KA, Chang RJ, Ehrmann DA, Ibanez L, Lobo RA, Rosenfield RL, Shapiro J, Montori  
562 VM, Swiglo BA. Evaluation and treatment of hirsutism in premenopausal women: an endocrine  
563 society clinical practice guideline. *The Journal of Clinical Endocrinology & Metabolism*.  
564 2008;93(4):1105-1120.

- 565 **35.** Charmandari E, Matthews DR, Johnston A, Brook CG, Hindmarsh PC. Serum cortisol and 17-  
566 hydroxyprogesterone interrelation in classic 21-hydroxylase deficiency: is current replacement  
567 therapy satisfactory? *The Journal of Clinical Endocrinology & Metabolism*. 2001;86(10):4679-  
568 4685.
- 569 **36.** Großschl M, Rauh M, Dörr HG. Cortisol and 17-hydroxyprogesterone kinetics in saliva after  
570 oral administration of hydrocortisone in children and young adolescents with congenital  
571 adrenal hyperplasia due to 21-hydroxylase deficiency. *The Journal of Clinical Endocrinology &*  
572 *Metabolism*. 2002;87(3):1200-1204.
- 573 **37.** Young M, Walker R, Riad-Fahmy D, Hughes I. Androstenedione rhythms in saliva in  
574 congenital adrenal hyperplasia. *Archives of disease in childhood*. 1988;63(6):624-628.
- 575
